# Supplementary material
Source: PubMed Central journal article supplement (PMC9938266)
Supplement: 41467_2023_36586_MOESM10_ESM.pdf [file 41467_2023_36586_MOESM10_ESM.pdf]

## Reporting Summary

Nature Portfolio wishes to improve the reproducibility of the work that we publish. This form provides structure for consistency and transparency in reporting. For further information on Nature Portfolio policies, see our [Editorial Policies](#) and the [Editorial Policy Checklist](#).

### Statistics

For all statistical analyses, confirm that the following items are present in the figure legend, table legend, main text, or Methods section.

- |     |           |
|-----|-----------|
| n/a | Confirmed |
|-----|-----------|
- The exact sample size ( $n$ ) for each experimental group/condition, given as a discrete number and unit of measurement
  - A statement on whether measurements were taken from distinct samples or whether the same sample was measured repeatedly
  - The statistical test(s) used AND whether they are one- or two-sided  
*Only common tests should be described solely by name; describe more complex techniques in the Methods section.*
  - A description of all covariates tested
  - A description of any assumptions or corrections, such as tests of normality and adjustment for multiple comparisons
  - A full description of the statistical parameters including central tendency (e.g. means) or other basic estimates (e.g. regression coefficient) AND variation (e.g. standard deviation) or associated estimates of uncertainty (e.g. confidence intervals)
  - For null hypothesis testing, the test statistic (e.g.  $F$ ,  $t$ ,  $r$ ) with confidence intervals, effect sizes, degrees of freedom and  $P$  value noted  
*Give  $P$  values as exact values whenever suitable.*
  - For Bayesian analysis, information on the choice of priors and Markov chain Monte Carlo settings
  - For hierarchical and complex designs, identification of the appropriate level for tests and full reporting of outcomes
  - Estimates of effect sizes (e.g. Cohen's  $d$ , Pearson's  $r$ ), indicating how they were calculated

*Our web collection on [statistics for biologists](#) contains articles on many of the points above.*

### Software and code

Policy information about [availability of computer code](#)

Data collection

Data analysis

For manuscripts utilizing custom algorithms or software that are central to the research but not yet described in published literature, software must be made available to editors and reviewers. We strongly encourage code deposition in a community repository (e.g. GitHub). See the Nature Portfolio [guidelines for submitting code & software](#) for further information.

## Data

Policy information about [availability of data](#)

All manuscripts must include a [data availability statement](#). This statement should provide the following information, where applicable:

- Accession codes, unique identifiers, or web links for publicly available datasets
- A description of any restrictions on data availability
- For clinical datasets or third party data, please ensure that the statement adheres to our [policy](#)

Data generated in this study (ChIP-seq, RNA-seq, and MNase-seq) is deposited in GEO with accession numbers GSE201036 and GSE218400. The mass spectrometry proteomics data have been deposited to the ProteomeXchange Consortium via the PRIDE partner repository with the dataset identifier PXD036586. All bioinformatic analysis was performed as described in the methods section. No additional code was developed.

## Human research participants

Policy information about [studies involving human research participants and Sex and Gender in Research](#).

Reporting on sex and gender

Population characteristics

Recruitment

Ethics oversight

Note that full information on the approval of the study protocol must also be provided in the manuscript.

## Field-specific reporting

Please select the one below that is the best fit for your research. If you are not sure, read the appropriate sections before making your selection.

Life sciences  Behavioural & social sciences  Ecological, evolutionary & environmental sciences

For a reference copy of the document with all sections, see [nature.com/documents/nr-reporting-summary-flat.pdf](https://nature.com/documents/nr-reporting-summary-flat.pdf)

## Life sciences study design

All studies must disclose on these points even when the disclosure is negative.

Sample size

Data exclusions

Replication

Randomization

Blinding

## Reporting for specific materials, systems and methods

We require information from authors about some types of materials, experimental systems and methods used in many studies. Here, indicate whether each material, system or method listed is relevant to your study. If you are not sure if a list item applies to your research, read the appropriate section before selecting a response.

## Materials & experimental systems

## Methods

- | n/a                                 | Involvement                                            |
|-------------------------------------|--------------------------------------------------------|
| <input type="checkbox"/>            | <input checked="" type="checkbox"/> Antibodies         |
| <input checked="" type="checkbox"/> | <input type="checkbox"/> Eukaryotic cell lines         |
| <input checked="" type="checkbox"/> | <input type="checkbox"/> Palaeontology and archaeology |
| <input checked="" type="checkbox"/> | <input type="checkbox"/> Animals and other organisms   |
| <input checked="" type="checkbox"/> | <input type="checkbox"/> Clinical data                 |
| <input checked="" type="checkbox"/> | <input type="checkbox"/> Dual use research of concern  |

- | n/a                                 | Involvement                                     |
|-------------------------------------|-------------------------------------------------|
| <input type="checkbox"/>            | <input checked="" type="checkbox"/> ChIP-seq    |
| <input checked="" type="checkbox"/> | <input type="checkbox"/> Flow cytometry         |
| <input checked="" type="checkbox"/> | <input type="checkbox"/> MRI-based neuroimaging |

## Antibodies

Antibodies used

anti Histone H3 antibody(Active Motif 39763 ), anti H3K4me3 antibody(Abcam ab8580), anti H3K4me2 antibody(Abcam ab7766)

Validation

H3 Antibody:  
Applications Validated by manufacturer Active Motif: Validation includes ChIP-Seq, ChIP, Immunofluorescence and western blot.  
ChIP-Seq: 4 µg per ChIP

H3K4me3 and H3K4me2 Antibody :  
Success from the first experiment – confirmed specificity through extensive validation by manufacturer Abcam.  
Validation includes ChIP, Immunofluorescence, western blot and the use of a peptide array.

## ChIP-seq

### Data deposition

- Confirm that both raw and final processed data have been deposited in a public database such as [GEO](#).
- Confirm that you have deposited or provided access to graph files (e.g. BED files) for the called peaks.

Data access links

*May remain private before publication.*

GSE201036

Files in database submission

ChIPseq\_H3K4me2\_WT\_t1\_rep1\_S25\_R1\_001.fastq.gz  
ChIPseq\_H3K4me2\_WT\_t1\_rep2\_S26\_R1\_001.fastq.gz  
ChIPseq\_H3K4me2\_WT\_t1\_rep3\_S27\_R1\_001.fastq.gz  
ChIPseq\_H3K4me2\_WT\_t2\_rep1\_S31\_R1\_001.fastq.gz  
ChIPseq\_H3K4me2\_WT\_t2\_rep2\_S32\_R1\_001.fastq.gz  
ChIPseq\_H3K4me2\_WT\_t2\_rep3\_S33\_R1\_001.fastq.gz  
ChIPseq\_H3K4me2\_rrp6\_t1\_rep1\_S28\_R1\_001.fastq.gz  
ChIPseq\_H3K4me2\_rrp6\_t1\_rep2\_S29\_R1\_001.fastq.gz  
ChIPseq\_H3K4me2\_rrp6\_t1\_rep3\_S30\_R1\_001.fastq.gz  
ChIPseq\_H3K4me2\_rrp6\_t2\_rep1\_S34\_R1\_001.fastq.gz  
ChIPseq\_H3K4me2\_rrp6\_t2\_rep2\_S35\_R1\_001.fastq.gz  
ChIPseq\_H3K4me2\_rrp6\_t2\_rep3\_S36\_R1\_001.fastq.gz  
ChIPseq\_H3K4me3\_WT\_t1\_rep1\_S37\_R1\_001.fastq.gz  
ChIPseq\_H3K4me3\_WT\_t1\_rep2\_S38\_R1\_001.fastq.gz  
ChIPseq\_H3K4me3\_WT\_t1\_rep3\_S39\_R1\_001.fastq.gz  
ChIPseq\_H3K4me3\_WT\_t2\_rep1\_S43\_R1\_001.fastq.gz  
ChIPseq\_H3K4me3\_WT\_t2\_rep2\_S44\_R1\_001.fastq.gz  
ChIPseq\_H3K4me3\_WT\_t2\_rep3\_S45\_R1\_001.fastq.gz  
ChIPseq\_H3K4me3\_rrp6\_t1\_rep1\_S40\_R1\_001.fastq.gz  
ChIPseq\_H3K4me3\_rrp6\_t1\_rep2\_S41\_R1\_001.fastq.gz  
ChIPseq\_H3K4me3\_rrp6\_t1\_rep3\_S42\_R1\_001.fastq.gz  
ChIPseq\_H3K4me3\_rrp6\_t2\_rep1\_S46\_R1\_001.fastq.gz  
ChIPseq\_H3K4me3\_rrp6\_t2\_rep2\_S47\_R1\_001.fastq.gz  
ChIPseq\_H3K4me3\_rrp6\_t2\_rep3\_S48\_R1\_001.fastq.gz  
ChIPseq\_H3\_WT\_t1\_rep1\_S13\_R1\_001.fastq.gz  
ChIPseq\_H3\_WT\_t1\_rep2\_S14\_R1\_001.fastq.gz  
ChIPseq\_H3\_WT\_t1\_rep3\_S15\_R1\_001.fastq.gz  
ChIPseq\_H3\_WT\_t2\_rep1\_S19\_R1\_001.fastq.gz  
ChIPseq\_H3\_WT\_t2\_rep2\_S20\_R1\_001.fastq.gz  
ChIPseq\_H3\_WT\_t2\_rep3\_S21\_R1\_001.fastq.gz  
ChIPseq\_H3\_rrp6\_t1\_rep1\_S16\_R1\_001.fastq.gz  
ChIPseq\_H3\_rrp6\_t1\_rep2\_S17\_R1\_001.fastq.gz  
ChIPseq\_H3\_rrp6\_t1\_rep3\_S18\_R1\_001.fastq.gz

ChIPseq\_H3\_rrp6\_t2\_rep1\_S22\_R1\_001.fastq.gz  
ChIPseq\_H3\_rrp6\_t2\_rep2\_S23\_R1\_001.fastq.gz  
ChIPseq\_H3\_rrp6\_t2\_rep3\_S24\_R1\_001.fastq.gz  
ChIPseq\_Input\_WT\_t1\_rep1\_S1\_R1\_001.fastq.gz  
ChIPseq\_Input\_WT\_t1\_rep2\_S2\_R1\_001.fastq.gz  
ChIPseq\_Input\_WT\_t1\_rep3\_S3\_R1\_001.fastq.gz  
ChIPseq\_Input\_WT\_t2\_rep1\_S7\_R1\_001.fastq.gz  
ChIPseq\_Input\_WT\_t2\_rep2\_S8\_R1\_001.fastq.gz  
ChIPseq\_Input\_WT\_t2\_rep3\_S9\_R1\_001.fastq.gz  
H3K4me2\_WT\_t1\_R1.mLb.cLN.sorted.bw  
H3K4me2\_WT\_t1\_R2.mLb.cLN.sorted.bw  
H3K4me2\_WT\_t1\_R3.mLb.cLN.sorted.bw  
H3K4me2\_WT\_t2\_R1.mLb.cLN.sorted.bw  
H3K4me2\_WT\_t2\_R2.mLb.cLN.sorted.bw  
H3K4me2\_WT\_t2\_R3.mLb.cLN.sorted.bw  
H3K4me2\_rrp6\_t1\_R1.mLb.cLN.sorted.bw  
H3K4me2\_rrp6\_t1\_R2.mLb.cLN.sorted.bw  
H3K4me2\_rrp6\_t1\_R3.mLb.cLN.sorted.bw  
H3K4me2\_rrp6\_t2\_R1.mLb.cLN.sorted.bw  
H3K4me2\_rrp6\_t2\_R2.mLb.cLN.sorted.bw  
H3K4me2\_rrp6\_t2\_R3.mLb.cLN.sorted.bw  
H3K4me3\_WT\_t1\_R1.mLb.cLN.sorted.bw  
H3K4me3\_WT\_t1\_R2.mLb.cLN.sorted.bw  
H3K4me3\_WT\_t1\_R3.mLb.cLN.sorted.bw  
H3K4me3\_WT\_t2\_R1.mLb.cLN.sorted.bw  
H3K4me3\_WT\_t2\_R2.mLb.cLN.sorted.bw  
H3K4me3\_WT\_t2\_R3.mLb.cLN.sorted.bw  
H3K4me3\_rrp6\_t1\_R1.mLb.cLN.sorted.bw  
H3K4me3\_rrp6\_t1\_R2.mLb.cLN.sorted.bw  
H3K4me3\_rrp6\_t1\_R3.mLb.cLN.sorted.bw  
H3K4me3\_rrp6\_t2\_R1.mLb.cLN.sorted.bw  
H3K4me3\_rrp6\_t2\_R2.mLb.cLN.sorted.bw  
H3K4me3\_rrp6\_t2\_R3.mLb.cLN.sorted.bw  
H3\_WT\_t1\_R1.mLb.cLN.sorted.bw  
H3\_WT\_t1\_R2.mLb.cLN.sorted.bw  
H3\_WT\_t1\_R3.mLb.cLN.sorted.bw  
H3\_WT\_t2\_R1.mLb.cLN.sorted.bw  
H3\_WT\_t2\_R2.mLb.cLN.sorted.bw  
H3\_WT\_t2\_R3.mLb.cLN.sorted.bw  
H3\_rrp6\_t1\_R1.mLb.cLN.sorted.bw  
H3\_rrp6\_t1\_R2.mLb.cLN.sorted.bw  
H3\_rrp6\_t1\_R3.mLb.cLN.sorted.bw  
H3\_rrp6\_t2\_R1.mLb.cLN.sorted.bw  
H3\_rrp6\_t2\_R2.mLb.cLN.sorted.bw  
H3\_rrp6\_t2\_R3.mLb.cLN.sorted.bw  
Input\_WT\_t1\_R1.mLb.cLN.sorted.bw  
Input\_WT\_t1\_R2.mLb.cLN.sorted.bw  
Input\_WT\_t1\_R3.mLb.cLN.sorted.bw  
Input\_WT\_t2\_R1.mLb.cLN.sorted.bw  
Input\_WT\_t2\_R2.mLb.cLN.sorted.bw  
Input\_WT\_t2\_R3.mLb.cLN.sorted.bw  
Input\_rrp6\_t1\_R1.mLb.cLN.sorted.bw  
Input\_rrp6\_t1\_R2.mLb.cLN.sorted.bw  
Input\_rrp6\_t1\_R3.mLb.cLN.sorted.bw  
Input\_rrp6\_t2\_R1.mLb.cLN.sorted.bw  
Input\_rrp6\_t2\_R2.mLb.cLN.sorted.bw  
Input\_rrp6\_t2\_R3.mLb.cLN.sorted.bw  
ChIPseq\_Input\_rrp6\_t1\_rep1\_S4\_R1\_001.fastq.gz  
ChIPseq\_Input\_rrp6\_t1\_rep2\_S5\_R1\_001.fastq.gz  
ChIPseq\_Input\_rrp6\_t1\_rep3\_S6\_R1\_001.fastq.gz  
ChIPseq\_Input\_rrp6\_t2\_rep1\_S10\_R1\_001.fastq.gz  
ChIPseq\_Input\_rrp6\_t2\_rep2\_S11\_R1\_001.fastq.gz  
ChIPseq\_Input\_rrp6\_t2\_rep3\_S12\_R1\_001.fastq.gz  
ChIPseq\_H3K4me2\_WT\_t1\_rep1\_S25\_R2\_001.fastq.gz  
ChIPseq\_H3K4me2\_WT\_t1\_rep2\_S26\_R2\_001.fastq.gz  
ChIPseq\_H3K4me2\_WT\_t1\_rep3\_S27\_R2\_001.fastq.gz  
ChIPseq\_H3K4me2\_WT\_t2\_rep1\_S31\_R2\_001.fastq.gz  
ChIPseq\_H3K4me2\_WT\_t2\_rep2\_S32\_R2\_001.fastq.gz  
ChIPseq\_H3K4me2\_WT\_t2\_rep3\_S33\_R2\_001.fastq.gz  
ChIPseq\_H3K4me2\_rrp6\_t1\_rep1\_S28\_R2\_001.fastq.gz  
ChIPseq\_H3K4me2\_rrp6\_t1\_rep2\_S29\_R2\_001.fastq.gz  
ChIPseq\_H3K4me2\_rrp6\_t1\_rep3\_S30\_R2\_001.fastq.gz  
ChIPseq\_H3K4me2\_rrp6\_t2\_rep1\_S34\_R2\_001.fastq.gz  
ChIPseq\_H3K4me2\_rrp6\_t2\_rep2\_S35\_R2\_001.fastq.gz  
ChIPseq\_H3K4me2\_rrp6\_t2\_rep3\_S36\_R2\_001.fastq.gz  
ChIPseq\_H3K4me3\_WT\_t1\_rep1\_S37\_R2\_001.fastq.gz

ChIPseq\_H3K4me3\_WT\_t1\_rep2\_S38\_R2\_001.fastq.gz  
 ChIPseq\_H3K4me3\_WT\_t1\_rep3\_S39\_R2\_001.fastq.gz  
 ChIPseq\_H3K4me3\_WT\_t2\_rep1\_S43\_R2\_001.fastq.gz  
 ChIPseq\_H3K4me3\_WT\_t2\_rep2\_S44\_R2\_001.fastq.gz  
 ChIPseq\_H3K4me3\_WT\_t2\_rep3\_S45\_R2\_001.fastq.gz  
 ChIPseq\_H3K4me3\_rrp6\_t1\_rep1\_S40\_R2\_001.fastq.gz  
 ChIPseq\_H3K4me3\_rrp6\_t1\_rep2\_S41\_R2\_001.fastq.gz  
 ChIPseq\_H3K4me3\_rrp6\_t1\_rep3\_S42\_R2\_001.fastq.gz  
 ChIPseq\_H3K4me3\_rrp6\_t2\_rep1\_S46\_R2\_001.fastq.gz  
 ChIPseq\_H3K4me3\_rrp6\_t2\_rep2\_S47\_R2\_001.fastq.gz  
 ChIPseq\_H3K4me3\_rrp6\_t2\_rep3\_S48\_R2\_001.fastq.gz  
 ChIPseq\_H3\_WT\_t1\_rep1\_S13\_R2\_001.fastq.gz  
 ChIPseq\_H3\_WT\_t1\_rep2\_S14\_R2\_001.fastq.gz  
 ChIPseq\_H3\_WT\_t1\_rep3\_S15\_R2\_001.fastq.gz  
 ChIPseq\_H3\_WT\_t2\_rep1\_S19\_R2\_001.fastq.gz  
 ChIPseq\_H3\_WT\_t2\_rep2\_S20\_R2\_001.fastq.gz  
 ChIPseq\_H3\_WT\_t2\_rep3\_S21\_R2\_001.fastq.gz  
 ChIPseq\_H3\_rrp6\_t1\_rep1\_S16\_R2\_001.fastq.gz  
 ChIPseq\_H3\_rrp6\_t1\_rep2\_S17\_R2\_001.fastq.gz  
 ChIPseq\_H3\_rrp6\_t1\_rep3\_S18\_R2\_001.fastq.gz  
 ChIPseq\_H3\_rrp6\_t2\_rep1\_S22\_R2\_001.fastq.gz  
 ChIPseq\_H3\_rrp6\_t2\_rep2\_S23\_R2\_001.fastq.gz  
 ChIPseq\_H3\_rrp6\_t2\_rep3\_S24\_R2\_001.fastq.gz  
 ChIPseq\_Input\_WT\_t1\_rep1\_S1\_R2\_001.fastq.gz  
 ChIPseq\_Input\_WT\_t1\_rep2\_S2\_R2\_001.fastq.gz  
 ChIPseq\_Input\_WT\_t1\_rep3\_S3\_R2\_001.fastq.gz  
 ChIPseq\_Input\_WT\_t2\_rep1\_S7\_R2\_001.fastq.gz  
 ChIPseq\_Input\_WT\_t2\_rep2\_S8\_R2\_001.fastq.gz  
 ChIPseq\_Input\_WT\_t2\_rep3\_S9\_R2\_001.fastq.gz  
 ChIPseq\_Input\_rrp6\_t1\_rep1\_S4\_R2\_001.fastq.gz  
 ChIPseq\_Input\_rrp6\_t1\_rep2\_S5\_R2\_001.fastq.gz  
 ChIPseq\_Input\_rrp6\_t1\_rep3\_S6\_R2\_001.fastq.gz  
 ChIPseq\_Input\_rrp6\_t2\_rep1\_S10\_R2\_001.fastq.gz  
 ChIPseq\_Input\_rrp6\_t2\_rep2\_S11\_R2\_001.fastq.gz  
 ChIPseq\_Input\_rrp6\_t2\_rep3\_S12\_R2\_001.fastq.gz

Genome browser session  
 (e.g. [UCSC](#))

Assembly: V64-1-1

## Methodology

|                         |                                                                                                                                                                                                                                                                                                                                                       |
|-------------------------|-------------------------------------------------------------------------------------------------------------------------------------------------------------------------------------------------------------------------------------------------------------------------------------------------------------------------------------------------------|
| Replicates              | each sample has three replicates                                                                                                                                                                                                                                                                                                                      |
| Sequencing depth        | ChIP-Seq and MNaseq coverage 5.5-18.3M mapped reads. RNA-Seq 17.7-60.6M and SLAM-Seq 14.28-23.48M mapped reads. Additional details in GEO.                                                                                                                                                                                                            |
| Antibodies              | anti Histone H3 antibody(Active Motif 39763 ), anti H3K4me3 antibody(Abcam ab8580), anti H3K4me2 antibody(Abcam ab7766)                                                                                                                                                                                                                               |
| Peak calling parameters | Peak calling was not performed.                                                                                                                                                                                                                                                                                                                       |
| Data quality            | FatsQC analysis. Exploration of data using IGV, and metagene and gene specific analysis confirming known biology of the investigated marks.                                                                                                                                                                                                           |
| Software                | R/3.6.3<br>deepTools/3.1.0<br>gnuparallel/20180822<br>ucsc-utilities/v345<br>sambamba/0.6.6<br>samtools/1.9<br>subread/1.5.2<br>MultiQC/1.7<br>DESeq2/1.26.0<br>ComplexHeatmap/2.2.0<br>tidyverse/1.3.0<br>Nextflow/20.10.0<br>nf-core/slamseq/1.0.0<br>TrimGalore/0.6.5<br>bwa/0.7.17<br>SeqKit/0.15.0<br>nf-core/mnaseseq/dev<br>ea-utils/1.1.2.537 |
